# Supplementary material for: Understanding Engagement Strategies in Digital Interventions for Mental Health Promotion: Scoping Review
Source: PubMed Central journal article supplement (PMC8726056; doi:10.2196/30000), 2021-12-20
Supplement: mental_v8i12e30000_app2.pdf [file mental_v8i12e30000_app2.pdf]

**Multimedia Appendix File 2. Systematic searches of electronic databases**

| Database                                                          | Platform         | Timeframe                 | Search Result | Deduplicates Search Result |
|-------------------------------------------------------------------|------------------|---------------------------|---------------|----------------------------|
| Medline                                                           | Ovid             | (1946– April 2020)        | 1262          | 1244                       |
| Cumulative Index to Nursing and Allied Health Literature (CINAHL) | Ebsco            | (1981– April 2020)        | 1100          | 490                        |
| The Social Science Citation Index (SSCI)                          | Web of Science   | (1900– April 2020)        | 597           | 140                        |
| Science Citation Index (SCI)                                      |                  | (1900– April 2020)        |               |                            |
| Emerging Sources Citation Index (ESCI)                            |                  | (2015– April 2020)        |               |                            |
| PsycInfo                                                          | Ovid             | (1806– April 2020)        | 690           | 417                        |
| CENTRAL and the Cochrane Database of Systematic Reviews (CDSR)    | Cochrane Library | (inception to April 2020) | 936           | 477                        |
