# Supplementary material for: Understanding Engagement Strategies in Digital Interventions for Mental Health Promotion: Scoping Review
Source: PubMed Central journal article supplement (PMC8726056; doi:10.2196/30000), 2021-12-20
Supplement: mental_v8i12e30000_app3.pdf [file mental_v8i12e30000_app3.pdf]

### Multimedia Appendix File 3. Search syntax for primary studies in Medline

| <i>Line</i> | <i>Search</i>                                                                                                                                                                                                                                                                      |
|-------------|------------------------------------------------------------------------------------------------------------------------------------------------------------------------------------------------------------------------------------------------------------------------------------|
| 1           | ((digital or mobile or ehealth or "e health" or mhealth or "m health" or online or web* or internet or computer* or technolog* or app? or automatic* or automate?) adj5 intervention*).mp.                                                                                         |
| 2           | ("cognitive behavio?r* therap*" or CBT) adj5 (mobile or electronic* or internet or web or online or computer* or digital* or technolog* or app?)).mp.                                                                                                                              |
| 3           | digital behavio?r* change intervention*.mp.                                                                                                                                                                                                                                        |
| 4           | icbt*.mp.                                                                                                                                                                                                                                                                          |
| 5           | "behavio?r* change technique*".mp.                                                                                                                                                                                                                                                 |
| 6           | exp mobile applications/                                                                                                                                                                                                                                                           |
| 7           | exp telemedicine/                                                                                                                                                                                                                                                                  |
| 8           | exp "internet-based intervention"/                                                                                                                                                                                                                                                 |
| 9           | or/1-8                                                                                                                                                                                                                                                                             |
| 10          | ((patient? or user? or consumer? or client? or participant? or people or individual?) adj5 (incentive* or reminder* or attrition or usage or tailoring or engag* or adher* or interact* or prompt* or adopt* or participat* or retention or retain* or feedback or interact*)).mp. |
| 11          | exp patient dropouts/                                                                                                                                                                                                                                                              |
| 12          | exp patient compliance/                                                                                                                                                                                                                                                            |
| 13          | or/10-12                                                                                                                                                                                                                                                                           |
| 14          | ((emotion* or psycholog* or mental) adj3 (health or stress* or problem* or disturb* or aspect* or state* or ill or illness or disorder* or disease* or wellbeing or well-being or wellness)).mp.                                                                                   |
| 15          | ("mental health" or depression* or dysthymi* or melancholi* or stress* or anxiet* or "emotional health" or depressive* or depressed or anxious) adj5 (prevention* or preventative or promotion* or initiative* or campaign*).mp.                                                   |
| 16          | exp mental health/                                                                                                                                                                                                                                                                 |
| 17          | exp depression/                                                                                                                                                                                                                                                                    |
| 18          | exp anxiety/                                                                                                                                                                                                                                                                       |
| 19          | exp stress, psychological/                                                                                                                                                                                                                                                         |
| 20          | exp health promotion/                                                                                                                                                                                                                                                              |
| 21          | or/14-20                                                                                                                                                                                                                                                                           |
| 22          | and/9,13,21                                                                                                                                                                                                                                                                        |
