# Supplementary material for: Understanding Engagement Strategies in Digital Interventions for Mental Health Promotion: Scoping Review
Source: PubMed Central journal article supplement (PMC8726056; doi:10.2196/30000), 2021-12-20
Supplement: mental_v8i12e30000_app5.pdf [file mental_v8i12e30000_app5.pdf]

### Multimedia Appendix File 5: Overview of observational and process data studies

| Author, year of publication | Number of participants <sup>c</sup> | Intervention description and duration                                                                                                                                                                              | Engagement strategy in intervention design                                                                                                                                                                                   | Effective engagement strategy according to authors' conclusion                                                                                                                        | Engagement rates                                                                                                 |
|-----------------------------|-------------------------------------|--------------------------------------------------------------------------------------------------------------------------------------------------------------------------------------------------------------------|------------------------------------------------------------------------------------------------------------------------------------------------------------------------------------------------------------------------------|---------------------------------------------------------------------------------------------------------------------------------------------------------------------------------------|------------------------------------------------------------------------------------------------------------------|
| Clarke et al [18], 2016     | 90                                  | Intervention assesses users' self-reported symptoms and then provides 24/7 access to a personalized intervention that includes real-time, self-monitoring of mood, interactive psychotherapeutic modules (7 weeks) | <ol style="list-style-type: none"> <li>1. Reminders to facilitate self-monitoring by SMS or email as scheduled by the user</li> <li>2. Graphical feedback about self-monitoring</li> </ol>                                   | <ol style="list-style-type: none"> <li>1. Personalized feedback incorporating program content</li> <li>2. Alerts and reminders</li> <li>3. Flexibility in agenda and usage</li> </ol> | NR                                                                                                               |
| Zarski et al [20], 2016     | 395                                 | 7 modules composed of psychoeducation and exercises for every module (4 to 7 weeks)                                                                                                                                | CG: Intervention                                                                                                                                                                                                             | IG1: Content focus guidance                                                                                                                                                           | CG: M=4.4 (SD 2.8)<br>(Mean (M) number of completed treatment modules)                                           |
|                             |                                     |                                                                                                                                                                                                                    | IG1: Personalized written feedback from e-coach on the completed exercises + reminder by e-coach once in 7 days (content-focused guidance)                                                                                   |                                                                                                                                                                                       | IG1: M=5.7 (SD 2.3)                                                                                              |
|                             |                                     |                                                                                                                                                                                                                    | IG2: Personalized feedback and adherence monitoring on demand of participants (adherence-focused guidance)                                                                                                                   |                                                                                                                                                                                       | IG2: M=5.6 (SD 2.3)                                                                                              |
| Chou et al [21], 2017       | NR                                  | Gamified challenges in browser-based community forum Players can invite other players to browser-based community. To form allies (4 weeks)                                                                         | <ol style="list-style-type: none"> <li>1. Gaming language</li> <li>2. Social forum</li> <li>3. Brightly colored layout; aesthetically pleasing icons</li> </ol>                                                              | NR                                                                                                                                                                                    | Completion rate: 20%<br>(Completion rate: percentage of users that completed 4-weeks intervention)               |
| Dryman et al [22], 2017     | 3439                                | Five modules: learning through psychoeducation, core skill development by cognitive restructuring, Two exposure modules, and final graduation module (12 weeks)                                                    | <ol style="list-style-type: none"> <li>1. Coaches paired with users to provide feedback and support through weekly calls</li> <li>2. Coach-initiated and automated emails to encourage participation and progress</li> </ol> | 1. Guidance and support through coaching                                                                                                                                              | Average activities/participant: 12<br>All module completion rate:16%<br>(Average activities/participant: average |

|                           |      |                                                                                                                      |                                                                                                                                                                     |                                                                                                             |                                                                                                                                                                                                                                                            |
|---------------------------|------|----------------------------------------------------------------------------------------------------------------------|---------------------------------------------------------------------------------------------------------------------------------------------------------------------|-------------------------------------------------------------------------------------------------------------|------------------------------------------------------------------------------------------------------------------------------------------------------------------------------------------------------------------------------------------------------------|
|                           |      |                                                                                                                      |                                                                                                                                                                     |                                                                                                             | of total number of activities completed by all participants<br><u>All module completion rate:</u> percentage of participants completing all 5 modules)                                                                                                     |
| Bakker et al [24] 2018    | 44   | Intervention assesses user inputs on distress and provides with daily coping activities/games (30 days)              | 1. Games designed with real-time coping strategies.<br>2. Rewards for daily completed games<br>2. Push notifications of incomplete games<br>3. Clean graphic design | NR                                                                                                          | NR                                                                                                                                                                                                                                                         |
| Morrison et al [25], 2018 | 543  | Tools to improve awareness of their thoughts or behaviors and support change in thinking patterns and behaviors (NR) | IG1: (web-based)                                                                                                                                                    | IG2:<br>1. Simple and reduced content<br>2. Easy Accessibility<br>3. Push notifications for incomplete tool | NR                                                                                                                                                                                                                                                         |
|                           |      |                                                                                                                      | IG2: (mobile app)<br>1. Simple and reduced content<br>2. Easy Accessibility<br>3. Push notifications for incomplete tool                                            |                                                                                                             | NR                                                                                                                                                                                                                                                         |
| Song et al [26], 2018     | 3076 | Self-help tools, a secure account with access to additional resources and links (NR)                                 | NR                                                                                                                                                                  | Personal email invitations to visit the site                                                                | Session rate: 2420 (45.51%).<br>Bounce rate 36.6%,<br>N of pages/ session:7.6,<br>Mean session duration: 3 min 42 s,<br>Conversion rate: 24.4%<br><u>(Session rate:</u><br>The percentage of new visits.<br><u>Bounce rate:</u> Bounce rate is single-page |

|                         |   |                                                                                                      |                                                                                                                                                                                                                              |                                                      |                                                                                                                                                                                                                                                          |
|-------------------------|---|------------------------------------------------------------------------------------------------------|------------------------------------------------------------------------------------------------------------------------------------------------------------------------------------------------------------------------------|------------------------------------------------------|----------------------------------------------------------------------------------------------------------------------------------------------------------------------------------------------------------------------------------------------------------|
|                         |   |                                                                                                      |                                                                                                                                                                                                                              |                                                      | <p>sessions divided by all sessions.</p> <p><u>N of Pages/ session:</u><br/>dividing the total number of page views by the total number of sessions</p> <p><u>Conversion rate:</u><br/>Number of goal conversions divided by the number of sessions)</p> |
| Carter et al [28], 2019 | 5 | Daily task, user-specific feedback, Informational resources, self-assessment page, journal page (NR) | <ol style="list-style-type: none"> <li>1. Self-monitoring tools for stress</li> <li>2. Goal setting with daily task</li> <li>3. User-specific feedback on stress level</li> <li>4. Reminders and progress summary</li> </ol> | Task with user-specific feedback and self-monitoring | <p>Task completion rate: 40-80%</p> <p><u>Task completion rate:</u> Each task completed by participant divided total number of participants</p>                                                                                                          |

Note: N: Number, NR: not reported. M: mean, SD: standard deviation. IG: Intervention group, CG: Control group
