# Supplementary material for: Understanding Engagement Strategies in Digital Interventions for Mental Health Promotion: Scoping Review
Source: PubMed Central journal article supplement (PMC8726056; doi:10.2196/30000), 2021-12-20
Supplement: mental_v8i12e30000_app6.pdf [file mental_v8i12e30000_app6.pdf]

## Multimedia Appendix File 6: Overview of experimental studies

| Study                        | N (%female)<br>Age M±SD | Intervention (duration)                                                                                                                                    | Engagement strategy in<br>intervention design by group                                                                                                  | Effective engagement<br>strategy (author<br>conclusion based on<br>the usability of study<br>arms) | Engagement rates of<br>different study arms                                                                                                                          |
|------------------------------|-------------------------|------------------------------------------------------------------------------------------------------------------------------------------------------------|---------------------------------------------------------------------------------------------------------------------------------------------------------|----------------------------------------------------------------------------------------------------|----------------------------------------------------------------------------------------------------------------------------------------------------------------------|
| Lappalainen et al [15], 2013 | 24 (0%)<br>47 ± 7       | 3 group meetings +<br>personal use of web<br>portal, apps, and devices<br>(3 months)                                                                       | CG: No intervention                                                                                                                                     | IG: Personalized<br>feedback                                                                       | NR                                                                                                                                                                   |
|                              |                         |                                                                                                                                                            | IG: Personalized feedback                                                                                                                               |                                                                                                    |                                                                                                                                                                      |
| Morris et al [17], 2015      | 166 (72%)<br>24±5       | Peers to peer's platform<br>for cognitive reappraisal<br>and socio-affective<br>support, supportive<br>reappraisals from online<br>crowd helpers (3 weeks) | CG: Expressive writing web-based                                                                                                                        | 1. Personalized<br>feedback<br>2. Support messages<br>from peers<br>3. Flexibility in usage        | CG: 75.2% completed<br>follow-up                                                                                                                                     |
|                              |                         |                                                                                                                                                            | IG:<br>1. Short content<br>2. Positive support messages from<br>peers<br>3. Quick feedback anytime<br>4. Repeated reminders<br>5. Accessibility anytime |                                                                                                    | IG: 77.7% completed<br>follow-up                                                                                                                                     |
| Ly et al [23],<br>2017       | 28<br>(54%)<br>26±7     | Learn strategies of<br>positive psychology<br>through fully automated<br>conversation, daily check-<br>ins, weekly summaries (2<br>weeks)                  | CG: No intervention                                                                                                                                     | IG: Fully automated<br>chatbot                                                                     | IG: 13/14 completed<br>intervention (defined as at<br>least 14 reflections over the<br>course of 14 days, as well<br>as not inactive for 7 or<br>more days in a row) |
|                              |                         |                                                                                                                                                            | IG: Fully automated chatbot<br>(conversational agent)                                                                                                   |                                                                                                    |                                                                                                                                                                      |
|                              | 259 (51%)<br>35±11      | Customization of avatar,<br>Attention Bias                                                                                                                 | IG1: Customized avatar/ABMT                                                                                                                             |                                                                                                    | NR                                                                                                                                                                   |

|                             |                    |                                                                                                                                                                         |                                                                                                                                                                                                                                                                                   |                                                |                                                                                                                                                                                                                                                                                                                                                                    |
|-----------------------------|--------------------|-------------------------------------------------------------------------------------------------------------------------------------------------------------------------|-----------------------------------------------------------------------------------------------------------------------------------------------------------------------------------------------------------------------------------------------------------------------------------|------------------------------------------------|--------------------------------------------------------------------------------------------------------------------------------------------------------------------------------------------------------------------------------------------------------------------------------------------------------------------------------------------------------------------|
| Birk and Mandryk [27], 2019 |                    | Modification Training (ABMT), negative mood induction (3 weeks)                                                                                                         | IG2: Customized avatar/ no ABMT                                                                                                                                                                                                                                                   | IG1: Avatar customization and personalization  |                                                                                                                                                                                                                                                                                                                                                                    |
|                             |                    |                                                                                                                                                                         | IG3: Generic avatar/ABMT                                                                                                                                                                                                                                                          |                                                |                                                                                                                                                                                                                                                                                                                                                                    |
|                             |                    |                                                                                                                                                                         | G4: Generic avatar/no ABMT                                                                                                                                                                                                                                                        |                                                |                                                                                                                                                                                                                                                                                                                                                                    |
| Przybylko et al [29], 2019  | 426 (69%)<br>47±16 | A video that presented evidence-based strategies for promoting mental health and emotional wellness, daily and weekly challenges, gamification, Social forum (12 weeks) | CG: No intervention                                                                                                                                                                                                                                                               | IG: Interactive components in the social forum | IG; Attrition Rate: 24%                                                                                                                                                                                                                                                                                                                                            |
|                             |                    |                                                                                                                                                                         | IG:<br>1. Real-time coping strategies for daily mission,<br>2. Social forum with interactive component<br>3. Rewards for completing missions.<br>4. Mission history available<br>5. Push notifications alert for incomplete mission<br>6. Clean graphic design reduces confusion. |                                                |                                                                                                                                                                                                                                                                                                                                                                    |
| Renfrew et al [30], 2020    | 458 (78%)<br>46±1  | Videos, workbook, reading materials relating to the topic, daily and weekly challenges (10 weeks)                                                                       | CG: Automated email support                                                                                                                                                                                                                                                       | IG2: Videoconference session + SMS reminders   | CG: Mv=6.05 (SD 4.0)<br>CG: Mc=369 (SD 362)<br>CG: AR= 21.9%<br>(Mean (Mv) Number of videos watched out of 10. Mean (Mc) challenge adherence score out of 1000.<br>Attrition Rate (AR) total number of randomized participants who did not complete either the preintervention (ie, early dropout) or the postintervention (ie, lost to follow-up) questionnaire.) |

|  |  |  |                                                                                                         |  |                                                                |
|--|--|--|---------------------------------------------------------------------------------------------------------|--|----------------------------------------------------------------|
|  |  |  | IG1: Automated email support + reminder SMS                                                             |  | IG1: Mv=6.48 (SD 3.9)<br>IG1: Mc=340 (SD 339)<br>IG1: AR=19.3% |
|  |  |  | IG2: Automated email support + videoconference session/ week + 1 reminder SMS for videoconference/ week |  | IG2: Mv=6.75 (SD 3.8)<br>IG2: Mc=377 (SD 354)<br>IG2: AR=31.6% |

Note: N: Number, NR: not reported. M: mean, SD: standard deviation. IG: Intervention group, CG: Control group
